# Supplementary material for: Highly Efficient Cpf1-Mediated Gene Targeting in Mice Following High Concentration Pronuclear Injection
Source: PubMed Central journal article supplement (PMC5295614; doi:10.1534/g3.116.038091), 2016-12-30
Supplement: 719FigureS3.pdf [file 719FigureS3.pdf]

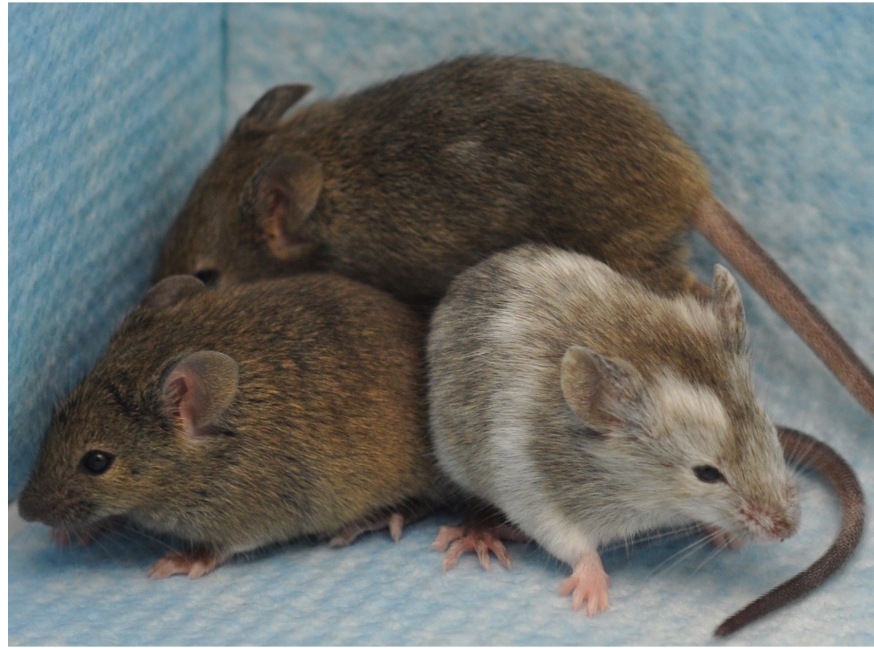

**Figure S3** Mosaic transmission of AsCpf1-mediated mutant alleles. 6 founders were bred to confirm transmission of the mutant alleles: 1 albino mouse and 5 mosaics ranging from 10-70% albino coat color contribution. In crosses of all 6 mice to FVB, germline transmission of the mutant allele occurred. Two of the 6 mice are shown here: the mouse with the lowest albino coat color contribution (10%) in the center, and the mouse with the highest coat color contribution (70%) on the right. For comparison, a wild-type agouti mouse is shown on the left.
