# Supplementary material for: Highly Efficient Cpf1-Mediated Gene Targeting in Mice Following High Concentration Pronuclear Injection
Source: PubMed Central journal article supplement (PMC5295614; doi:10.1534/g3.116.038091), 2016-12-30
Supplement: 719TableS1.pdf [file 719TableS1.pdf]

**Table S1. Summary of injection sessions**

| <b>Cpf1<br/>(ng/μl)</b>                                     | <b>Target A<br/>(ng/μl)</b> | <b>Target B<br/>(ng/μl)</b> | <b>Egg strain<br/>(♀ x ♂)</b> | <b># eggs<br/>implanted</b> | <b># pups or<br/>embryos<br/>recovered</b> | <b>#<br/>founders<br/>targeted</b> | <b>%<br/>founders<br/>targeted</b> |
|-------------------------------------------------------------|-----------------------------|-----------------------------|-------------------------------|-----------------------------|--------------------------------------------|------------------------------------|------------------------------------|
| 10                                                          | 2.5                         | 2.5                         | B6xFVB                        | 128                         | 24                                         | 5/24                               | 20.8%                              |
| 10                                                          | 2.5                         | 2.5                         | B6xFVB                        | 101                         | 30                                         | 1/30                               | 3.3%                               |
| 10                                                          | 2.5                         | 2.5                         | FVBxB6                        | 180                         | 54                                         | 1/54                               | 1.9%                               |
| 10                                                          | 2.5                         | 2.5                         | FVBxB6                        | 110                         | 17                                         | 0/17                               | 0.0%                               |
| 10                                                          | 2.5                         | 2.5                         | FVBxB6                        | 168                         | 36                                         | 0/36                               | 0.0%                               |
| 10                                                          | 2.5                         | -                           | FVBxB6                        | 40                          | 1                                          | 0/1                                | 0.0%                               |
| 10                                                          | 2.5                         | -                           | FVBxB6                        | 144                         | 45                                         | 0/45                               | 0.0%                               |
| 50                                                          | 100                         | 100                         | B6xFVB                        | 50                          | 21                                         | 18/21                              | 85.7%                              |
| 50                                                          | 100                         | 100                         | B6xFVB                        | 48                          | 23                                         | 21/23                              | 91.3%                              |
| 50                                                          | 100                         | 100                         | B6 x B6                       | 62                          | 16                                         | 13/16                              | 81.2%                              |
| 50                                                          | 100                         | 100                         | FVBxB6                        | 80                          | 2                                          | 2/2                                | 100%                               |
| 50                                                          | 100                         | -                           | FVBxB6                        | 72                          | 11                                         | 5/11                               | 45.5%                              |
| 50                                                          | 100                         | -                           | FVBxB6                        | 100                         | 17                                         | 7/17                               | 41.2%                              |
| <b>Average across all 12 injection sessions:</b>            |                             |                             |                               |                             |                                            | <b>73/297</b>                      | <b>24.6%</b>                       |
| <b>Average for 7 low concentration injection sessions:</b>  |                             |                             |                               |                             |                                            | <b>7/207</b>                       | <b>3.4%</b>                        |
| <b>Average for 6 high concentration injection sessions:</b> |                             |                             |                               |                             |                                            | <b>66/90</b>                       | <b>73.3%</b>                       |
