# Supplementary material for: Highly Efficient Cpf1-Mediated Gene Targeting in Mice Following High Concentration Pronuclear Injection
Source: PubMed Central journal article supplement (PMC5295614; doi:10.1534/g3.116.038091), 2016-12-30
Supplement: 719TableS2.pdf [file 719TableS2.pdf]

**Table S2. Effect of strain on targeting rate for each injection concentration\***

|                                         | <b>B6 ♀ x FVB ♂</b> | <b>FVB ♀ x B6 ♂</b> | <b>Comparison<br/>(Fisher's)</b> |
|-----------------------------------------|---------------------|---------------------|----------------------------------|
| <b>Total for all injection sessions</b> | 45/98 (45.9%)       | 15/183 (8.2%)       | <b>P &lt; 0.0001</b>             |
| <b>High concentration with 2 guides</b> | 39/44 (88.6%)       | 2/2 (100%)          | <b>P = 1.0000</b>                |
| <b>High concentration with 1 guide</b>  | -                   | 12/28 (42.9%)       | -                                |
| <b>Low concentration with 2 guides</b>  | 6/54 (11.1%)        | 1/107 (0.9%)        | <b>P = 0.0060</b>                |
| <b>Low concentration with 1 guide</b>   | -                   | 0/46 (0%)           | -                                |

**\*Data in this table is tallied from Supplemental Table 1**
