# Supplementary material for: Highly Efficient Cpf1-Mediated Gene Targeting in Mice Following High Concentration Pronuclear Injection
Source: PubMed Central journal article supplement (PMC5295614; doi:10.1534/g3.116.038091), 2016-12-30
Supplement: 719TableS3.pdf [file 719TableS3.pdf]

**Table S3. Effect of concentration on targeting rate for each strain\***

|                                     | <b>High<br/>Concentration</b> | <b>Low<br/>Concentration</b> | <b>Comparison<br/>(Fisher's)</b> |
|-------------------------------------|-------------------------------|------------------------------|----------------------------------|
| <b>B6 ♀ x FVB ♂, all injections</b> | 39/44 (88.6%)                 | 6/54 (11.1%)                 | <b>P &lt; 0.0001</b>             |
| <b>B6 ♀ x FVB ♂ with 2 guides</b>   | 39/44 (88.6%)                 | 6/54 (11.1%)                 | <b>P &lt; 0.0001</b>             |
| <b>B6 ♀ x FVB ♂ with 1 guide</b>    | -                             | -                            | -                                |
| <b>FVB ♀ x B6 ♂, all injections</b> | 14/30 (46.7%)                 | 1/153 (0.7%)                 | <b>P &lt; 0.0001</b>             |
| <b>FVB ♀ x B6 ♂ with 2 guides</b>   | 2/2 (100%)                    | 1/107 (0.9%)                 | <b>P = 0.0005</b>                |
| <b>FVB ♀ x B6 ♂ with 1 guide</b>    | 12/28 (42.9%)                 | 0/46 (0%)                    | <b>P &lt; 0.0001</b>             |

**\*Data in this table is tallied from Supplemental Table 1**
