# Supplementary material for: Highly Efficient Cpf1-Mediated Gene Targeting in Mice Following High Concentration Pronuclear Injection
Source: PubMed Central journal article supplement (PMC5295614; doi:10.1534/g3.116.038091), 2016-12-30
Supplement: 719TableS4.pdf [file 719TableS4.pdf]

**Table S4: Comparison of successful targeting with AsCpf1**

| Reference                  | Delivery                          | Cpf1                    | Guide RNA        | Gene                   | # of founders targeted   | % of founders targeted |
|----------------------------|-----------------------------------|-------------------------|------------------|------------------------|--------------------------|------------------------|
| Hur et al. 2016            | Pronuclear microinjection of RNPs | 200 ng/ $\mu$ l protein | 9000 ng/ $\mu$ l | Foxn1                  | 10/12 blasts             | 83.0                   |
| Hur et al. 2016            | Pronuclear microinjection of RNPs | 200 ng/ $\mu$ l protein | 9000 ng/ $\mu$ l | Foxn1                  | 1/6 offspring            | 17.0                   |
| Hur et al. 2016            | Electroporation of RNPs           | 100 ng/ $\mu$ l protein | 250 ng/ $\mu$ l  | Foxn1                  | 16/25 blasts             | 64.0                   |
| Hur et al. 2016            | Electroporation of RNPs           | 100 ng/ $\mu$ l protein | 250 ng/ $\mu$ l  | Foxn1                  | 3/7 offspring            | 43.0                   |
| Hur et al. 2016            | Electroporation of RNPs           | 100 ng/ $\mu$ l protein | 250 ng/ $\mu$ l  | Tyr                    | 4/12 blasts              | 33.0                   |
| Hur et al. 2016            | Electroporation of RNPs           | 100 ng/ $\mu$ l protein | 250 ng/ $\mu$ l  | Tyr                    | 1/7 offspring            | 14.0                   |
| Kim et al. 2016            | Cytoplasmic microinjection of RNA | 50 ng/ $\mu$ l mRNA     | 100 ng/ $\mu$ l  | p53 guide #1           | 12/16 embryos            | 75.0                   |
| Kim et al. 2016            | Cytoplasmic microinjection of RNA | 50 ng/ $\mu$ l mRNA     | 100 ng/ $\mu$ l  | p53 guide #2           | 3/7 embryos              | 42.9                   |
| Kim et al. 2016            | Cytoplasmic microinjection of RNA | 50 ng/ $\mu$ l mRNA     | 100 ng/ $\mu$ l  | p53 guide #1&2         | 19/24 newborns           | 79.2                   |
| Kim et al. 2016            | Cytoplasmic microinjection of RNA | 50 ng/ $\mu$ l mRNA     | 100 ng/ $\mu$ l  | Prkdc guide #1& 2      | 2/11 newborns            | 18.2                   |
| Kim et al. 2016            | Cytoplasmic microinjection of RNA | 50 ng/ $\mu$ l mRNA     | 50 ng/ $\mu$ l   | p53 & Prkdc (4 guides) | 25/35 embryos            | 71.4                   |
| Watkins-Chow et al: "Low"  | Pronuclear Injection of RNA       | 10 ng/ $\mu$ l mRNA     | 2.5 ng/ $\mu$ l  | Tyr guide A & B        | 7/207 offspring& embryos | 3.4*                   |
| Watkins-Chow et al: "High" | Pronuclear Injection of RNA       | 50 ng/ $\mu$ l mRNA     | 100 ng/ $\mu$ l  | Tyr guide A & B        | 66/90 embryos            | 73.3*                  |

\*Results from the current publication are provided as an average of multiple injection sessions. See Supplemental Table 1 for details of individual injections. Results for Hur et al. 2016 and Kim et al. 2016 are presented as individual experiments as provided in publication for comparison.
